# Supplementary material
Source: PubMed Central journal article supplement (PMC1088069)

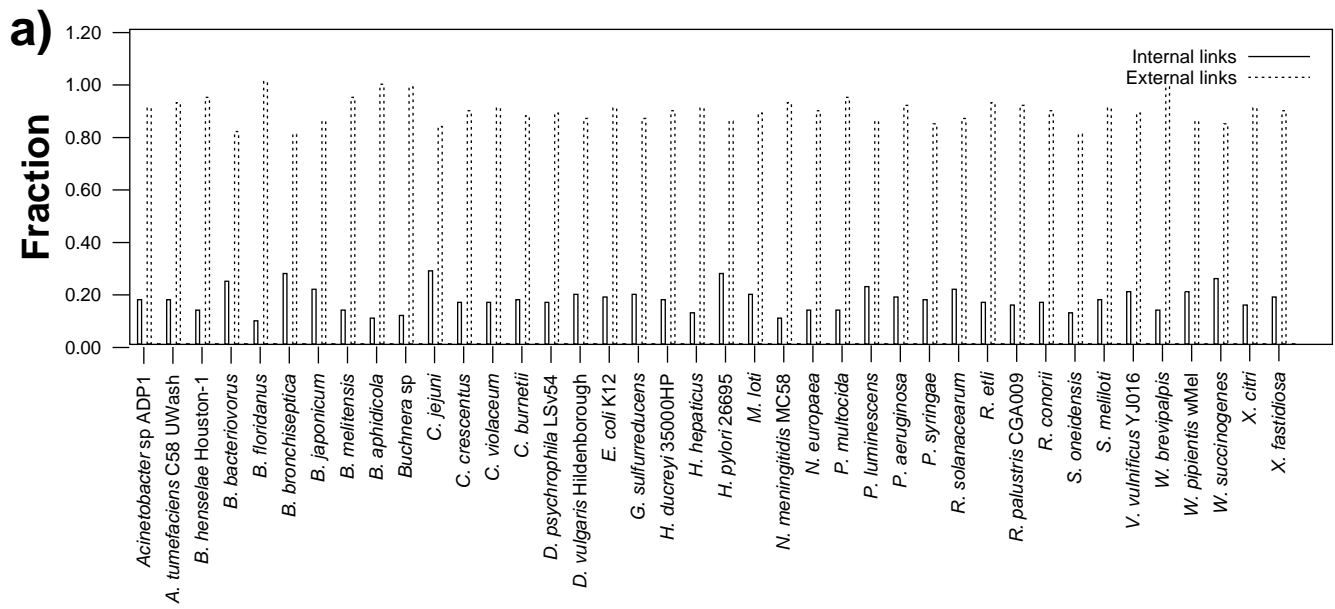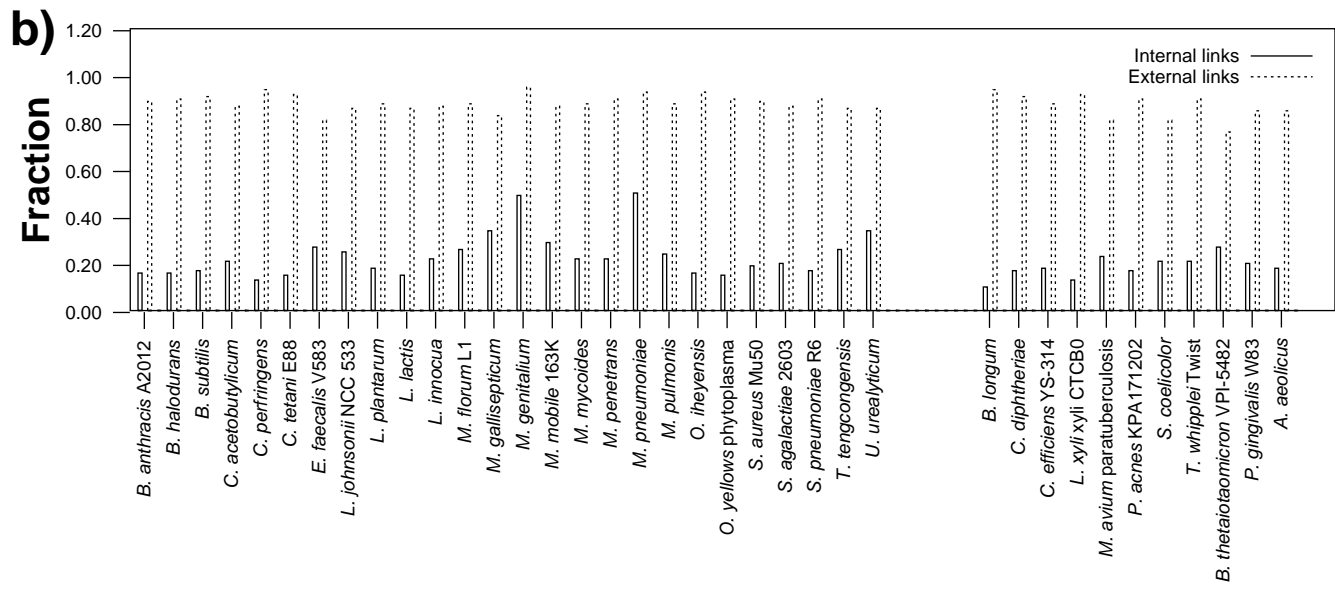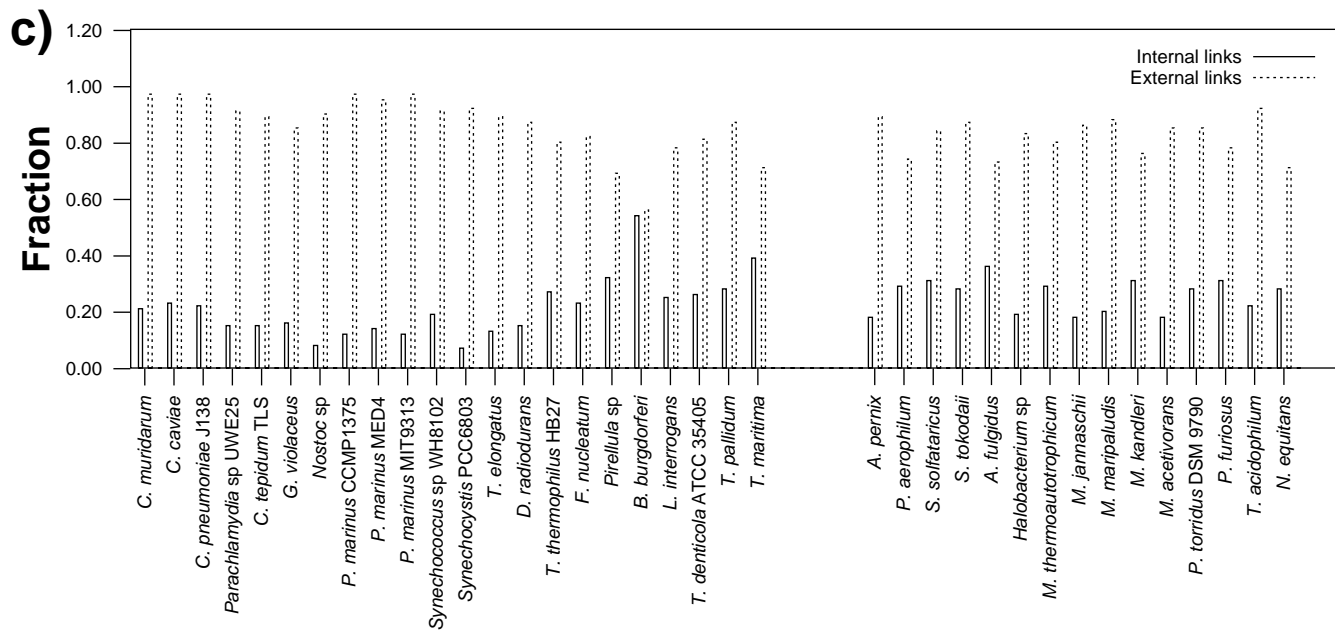

Supplement: nar_33_8_2521__1.pdf [file nar_33_8_2521__1.pdf]
